# Supplementary material for: Identification of emulsifier potato peptides by bioinformatics: application to omega-3 delivery emulsions and release from potato industry side streams
Source: PubMed Central journal article supplement (PMC6971092; doi:10.1038/s41598-019-57229-6), 2020-01-20
Supplement: 41598_2019_57229_MOESM1_ESM.pdf [file 41598_2019_57229_MOESM1_ESM.pdf]

## SUPPLEMENTARY MATERIAL

### **Identification of emulsifier potato peptides by bioinformatics: application to omega-3 delivery emulsions and release from potato industry side streams**

Pedro J. García-Moreno<sup>1\*</sup>, Simon Gregersen<sup>2</sup>, Elham R. Nedamani<sup>1</sup>, Tobias H. Olsen<sup>3</sup>, Paolo Marcatili<sup>3</sup>, Michael T. Overgaard<sup>2</sup>, Mogens L. Andersen<sup>4</sup>, Egon B. Hansen<sup>1</sup>, Charlotte Jacobsen<sup>1</sup>

<sup>1</sup> National Food Institute, Technical University of Denmark, Denmark

<sup>2</sup> Department of Chemistry and Bioscience, Aalborg University, Denmark

<sup>3</sup> Department of Bio and Health Informatics, Technical University of Denmark, Denmark

<sup>4</sup> Department of Food Science, University of Copenhagen, Denmark

*Pedro J. García-Moreno and Simon Gregersen contributed equally to this work.*

---

\* Corresponding author: pejeg@food.dtu.dk

Table 1S. Initially selected proteins from *Solanum tuberosum* used to identify emulsifier peptides by bioinformatics

| Entry      | Protein                                                                   | Length |
|------------|---------------------------------------------------------------------------|--------|
| P15478     | Patatin-T5                                                                | 386    |
| P15477     | Patatin-B2                                                                | 386    |
| Q3YJT5     | Patatin-05                                                                | 387    |
| P11768     | Patatin group M-1                                                         | 386    |
| Q2MY60     | Patatin-02                                                                | 387    |
| Q2MY43     | Patatin-08                                                                | 387    |
| Q42502     | Patatin-2-Kuras 3                                                         | 386    |
| Q3YJS9     | Probable inactive patatin-3-Kuras 1                                       | 374    |
| Q3YJT3     | Patatin-2-Kuras 1                                                         | 374    |
| Q8RXA3     | Cathepsin D inhibitor (KTI-A protein) (Kunitz-type enzyme inhibitor P4E1) | 220    |
| Q3S474     | KTI-B protein (Kunitz-type protease inhibitor)                            | 221    |
| Q3S477     | KTI-B protein (Kunitz-type protease inhibitor)                            | 219    |
| Q2XPX8     | KTI-B protein (Kunitz-type protease inhibitor-like protein)               | 213    |
| Q3S488     | Kunitz-type protease inhibitor                                            | 220    |
| Q3S481     | Kunitz-type protease inhibitor                                            | 220    |
| A0A097H149 | Kunitz-type inhibitor B                                                   | 221    |
| Q38M77     | Kunitz-type protease inhibitor                                            | 220    |
| Q3S489     | Kunitz-type protease inhibitor                                            | 221    |
| Q3S482     | Kunitz-type protease inhibitor                                            | 220    |
| Q3S479     | Kunitz-type protease inhibitor                                            | 220    |
| Q8H9D6     | Kunitz-type trypsin inhibitor                                             | 220    |
| Q2XPY0     | Kunitz-type protease inhibitor-like protein                               | 213    |
| M1LA62     | Kunitz-type protease inhibitor D                                          | 219    |
| Q8W126     | Kunitz-type enzyme inhibitor S9C11                                        | 242    |
| L0AQL9     | Kunitz-type proteinase inhibitor PKI2                                     | 221    |
| A0A097H120 | Clone PI8311 Kunitz-type inhibitor A/B mRNA                               | 203    |
| Q66LL8     | Kunitz-type proteinase inhibitor                                          | 194    |
| Q66LL2     | Kunitz-type proteinase inhibitor group B                                  | 194    |
| H9B8J1     | Kunitz-type proteinase inhibitor group A1                                 | 191    |
| H9B8I9     | Kunitz-type proteinase inhibitor group A1                                 | 191    |
| Q8LJQ0     | Kunitz-type proteinase inhibitor                                          | 192    |
| H9B8I8     | Kunitz-type proteinase inhibitor group A1                                 | 191    |
| H9B8J0     | Kunitz-type proteinase inhibitor group A1                                 | 190    |
| M1KPH5     | Kunitz-type protease inhibitor C                                          | 178    |

Table 2S. Detailed description of the ramped gradient used for LC-MS/MS analysis of potato side stream samples.

| <b>Time [mm:ss]</b> | <b>Duration [mm:ss]</b> | <b>Mixture [%B]</b> | <b>Flow [nL/min]</b> |
|---------------------|-------------------------|---------------------|----------------------|
| 00:00               | 00:00                   | 5                   | 300                  |
| 01:00               | 01:00                   | 5                   | 300                  |
| 05:00               | 04:00                   | 12                  | 300                  |
| 145:00              | 140:00                  | 37                  | 300                  |
| 150:00              | 05:00                   | 50                  | 300                  |
| 151:00              | 01:00                   | 100                 | 300                  |
| 165:00              | 14:00                   | 100                 | 300                  |
| 170:00              | 05:00                   | 5                   | 300                  |

Table 3S: Summary statistics for LC-MS/MS proteomics analysis of potato side stream samples using MaxQuant.

| <b>Sample</b>               | <b>AKV-Feed</b> | <b>AKV-K2</b> | <b>KMC-Feed</b> | <b>KMC-Food</b> | <b>AKV-PFJ</b> |
|-----------------------------|-----------------|---------------|-----------------|-----------------|----------------|
| # total peptides (matched)  | 1229            | 1034          | 1208            | 3958            | 7840           |
| # total protein groups      | 394             | 334           | 342             | 1007            | 1689           |
| # contaminant proteins      | 24              | 26            | 52              | 31              | 41             |
| # reverse protein hits      | 3               | 4             | 3               | 11              | 24             |
| # potato protein groups     | 367             | 304           | 287             | 965             | 1624           |
| # potential potato proteins | 1154            | 948           | 912             | 2356            | 3633           |

Table 4S. Identified and quantified patatin isoforms by LC-MS/MS. Proteins were identified by their UniProt AC# and quantified sample-wise using the iBAQ algorithm in MaxQuant (normalized to riBAQ).

| AKV-Feed |        | AKV-K2 |        | KMC-Feed |        | KMC-Food |        | AKV-PFJ |       |
|----------|--------|--------|--------|----------|--------|----------|--------|---------|-------|
| AC#      | riBAQ  | AC#    | riBAQ  | AC#      | riBAQ  | AC#      | riBAQ  | AC#     | riBAQ |
| Q3YJT3   | 22.6%  | Q3YJT3 | 13.7%  | P15477   | 29.6%  | Q2MY60   |        | Q2MY45  |       |
| Q2MY44   | 20.2%  | Q2MY44 | 9.3%   | Q2MY44   | 12.5%  | Q2MY59   |        | Q2MY36  | 12.7% |
| Q3YJS9   | 4.0%   | Q3YJS9 | 1.4%   | Q3YJS9   | 4.9%   | Q2MY58   | 11.2%  | P15476  | 4.8%  |
| Q2VBJ3   |        | Q2VBJ3 |        | Q2VBJ3   |        | Q2MY50   |        | Q2MY42  |       |
| Q2VBJ2   |        | Q2VBJ2 |        | Q2VBJ2   |        | Q3YJT4   |        | Q3YJS9  |       |
| Q2MYJ6   |        | Q2MYJ6 |        | Q2MYJ6   |        | Q41487   |        | Q2VBJ3  |       |
| Q2MYJ4   |        | Q2MYJ4 |        | Q2MYJ4   |        | Q2MYW0   |        | Q2VBJ2  |       |
| Q2MYC5   |        | Q2MYC5 |        | Q2MYC5   |        | Q2MYK2   |        | Q2MYJ6  |       |
| Q2MY85   |        | Q2MY85 | Q2MY85 | Q2VBI1   |        | Q2MYJ4   |        |         |       |
| Q2MY98   |        | Q2MY88 | Q2MYB7 | Q2MY36   |        | Q2MYC5   |        |         |       |
| Q2MYF1   |        | Q2MY88 | Q2MY88 | Q2MY45   |        | Q2MY85   |        |         |       |
| Q2MYE9   |        | Q2MY88 | Q9AUH5 | Q2MY42   |        | Q2MY88   |        |         |       |
| Q2MYB8   |        | Q2MY88 | M1BFJ1 | P15476   | Q2MYB7 |          |        |         |       |
| Q2MY88   |        | Q3YJT3 | 4.0%   | Q3YJS9   | 2.7%   | Q2MY44   | 3.2%   |         |       |
| Q2MYB7   |        | Q3YJT4 |        | Q3YJT3   | 1.8%   | Q3YJT3   | 1.3%   |         |       |
| Q3YJT4   |        | 3.8%   |        |          |        |          | Q3YJT4 | 1.2%    |       |
| Q2MY60   |        |        | Q2MY60 | Q2MY59   | Q2MY59 | Q2MY60   |        |         |       |
| Q2MY59   |        |        | Q2MY58 | Q2MY58   | Q2MY58 | Q2MY59   |        |         |       |
| Q2MY58   | Q2MY50 |        | Q2MY50 | Q41487   | Q2MY58 |          |        |         |       |
| Q2MY50   | Q2VBJ0 |        | Q2VBJ0 | Q2VBI9   | Q2MY50 |          |        |         |       |
| Q2VBJ0   | Q2VBI9 |        | Q2VBI9 | Q2VBI6   | Q2MYW0 |          |        |         |       |
| Q2VBI9   | Q2VBI6 |        | Q2VBI6 | Q2MYX4   | Q2MYK2 |          |        |         |       |
| Q2VBI6   | Q2MYY2 |        | Q2MYX4 | Q2MYW0   |        |          |        |         |       |
| Q2MYY2   | Q2MYX5 |        | Q2MYW0 | Q2MYV6   |        |          |        |         |       |
| Q2MYX5   | Q2MYX4 |        | Q2MYV6 | Q2MYV1   |        |          |        |         |       |
| Q2MYX4   | Q2MYW0 |        | Q2MYT1 | Q2MYT1   |        |          |        |         |       |
| Q2MYW0   | Q2MYV6 |        | Q2MYS7 | Q2MYS7   |        |          |        |         |       |
| Q2MYV6   | Q2MYV1 |        | Q2MYS6 | Q2MYS6   |        |          |        |         |       |
| Q2MYV1   | Q2MYT1 |        | Q2MYS2 | Q2MYS2   |        |          |        |         |       |
| Q2MYT1   | Q2MYS9 |        | Q2MYQ3 | Q2MYQ3   |        |          |        |         |       |
| Q2MYS9   | Q2MYS7 |        | Q2MYN1 | Q2MYN1   |        |          |        |         |       |
| Q2MYS7   | Q2MYS6 |        | Q2MYK2 | Q2MYK2   |        |          |        |         |       |
| Q2MYS6   | Q2MYS2 |        | Q2MYJ9 | Q2MYJ9   |        |          |        |         |       |
| Q2MYS2   | Q2MYQ3 |        | Q2MYG9 | Q2MYG9   |        |          |        |         |       |
| Q2MYQ3   | Q2MYN1 |        | Q2MYF3 | Q2MYF3   |        |          |        |         |       |
| Q2MYN1   | Q2MYK2 |        | Q2MYE1 | Q2MYE1   |        |          |        |         |       |
| Q2MYK2   | Q2MYJ9 |        | Q2MY96 | Q2MY96   |        |          |        |         |       |
| Q2MYJ9   | Q2MYJ1 |        | Q2MYM3 | Q2MYM3   |        |          |        |         |       |
| Q2MYJ1   | Q2MYH4 |        | Q2MYH4 | Q2MYH4   |        |          |        |         |       |
| Q2MYH4   | Q2MYG9 |        |        |          |        |          |        |         |       |

|        |      |
|--------|------|
| Q2MYF4 |      |
| Q2MYF3 |      |
| Q2MYE1 |      |
| Q2MY96 |      |
| Q2MYM3 |      |
| Q2MYW8 |      |
| Q2MY72 |      |
| Q2VBI7 |      |
| Q2MYU1 |      |
| Q2MYM8 |      |
| Q2MY67 |      |
| Q2MYW1 |      |
| Q7DMV4 |      |
| Q3YJT0 | 1.6% |
| Q2VBI2 | 1.1% |
| Q2MY99 |      |
| Q3YJT2 | 1.0% |

|        |      |
|--------|------|
| Q2MYF4 |      |
| Q2MYX7 |      |
| Q2MYW4 |      |
| Q2MYU3 |      |
| Q2MYS5 |      |
| Q2MYP2 |      |
| Q2MYK7 |      |
| Q2MYE8 |      |
| Q2MYW8 |      |
| Q2MY72 |      |
| Q2VBI7 |      |
| Q2MYU1 |      |
| Q2MYM8 |      |
| Q2MY67 |      |
| Q2MYW1 |      |
| Q42502 | 1.3% |
| P07745 | 1.1% |
| M1BFJ0 |      |

Table 5S. Identified and quantified protease inhibitors (KTIs, PINs, and MCPIs) by LC-MS/MS. Proteins were identified by their UniProt AC# and quantified sample-wise using the iBAQ algorithm in MaxQuant (normalized to riBAQ).

| AKV-Feed   |        | AKV-K2 |            | KMC-Feed   |            | KMC-Food   |            | AKV-PFJ    |            |            |      |
|------------|--------|--------|------------|------------|------------|------------|------------|------------|------------|------------|------|
| AC#        | riBAQ  | AC#    | riBAQ      | AC#        | riBAQ      | AC#        | riBAQ      | AC#        | riBAQ      |            |      |
| Q3S488     | 8.8%   | Q3S493 | 9.2%       | Q3S488     | 8.3%       | Q3S488     | 12.3%      | Q3S488     | 8.9%       |            |      |
| Q3S482     |        | Q41484 | 5.5%       | Q3S482     |            | Q3S479     |            | Q3S479     |            | Q3S482     |      |
| Q3S479     |        | Q2XPX8 |            | Q3S479     |            | Q3S482     |            |            |            |            |      |
| Q41484     | 5.1%   | Q2XPY0 | 4.1%       | Q2XPY0     | 3.4%       | Q8H9D6     | 7.8%       | A0A097H164 | 7.5%       |            |      |
| Q2XPX8     |        | Q3S488 |            | P58515     | 2.3%       | Q00652     |            | Q2XPY0     | 5.8%       |            |      |
| P58517     |        | Q3S482 |            | Q8H9D6     | 2.2%       | A0A097H1A0 |            | Q8S382     | H9B8I9     | 2.7%       |      |
| O24385     | 3.7%   | Q3S479 | Q00652     | Q8S382     |            | 6.7%       | Q41484     | 2.4%       | Q8H9D6     |            |      |
| Q8RX93     |        | Q38M77 | 1.7%       | A0A097H1A0 | Q2XPX8     |            | Q00652     |            |            |            |      |
| A0A097H166 |        | Q41432 | 1.6%       | Q8S382     | 5.3%       | A0A097H164 | A0A097H1A0 | 2.3%       | Q8H9D6     |            |      |
| O24386     |        | Q3S486 |            | O24372     |            | H9B8I9     | M1AMY0     |            | Q8S382     |            |      |
| Q8RX92     |        | P58515 | 1.5%       | P16348     | A0A097H157 | 4.6%       | P58515     | 2.3%       | A0A097H164 |            |      |
| A0A097H155 |        | P24743 | 1.4%       | P58520     | P58515     | 3.3%       | O24383     | 2.1%       | M1KPH5     |            |      |
| P58515     | Q43648 | P58518 |            | P24743     | A0A097H120 | 2.6%       | Q6PMR6     |            |            |            |      |
| Q8L5X4     | Q07459 | H9B8J0 |            | A0A097H120 | 2.2%       | Q38M77     | O24384     |            |            |            |      |
| M1AKE4     | 2.5%   | Q3S485 | 1.3%       | M1AKE5     | 1.4%       | Q24383     | 1.8%       | A0A097H155 | 2.0%       |            |      |
| Q66LL8     |        | Q3S483 | 1.0%       | K7XKR4     |            | O24383     |            | M1KPH5     |            | A0A097H157 |      |
| Q66LL2     |        | 1.0%   |            | A0A097H118 |            | M1AKE3     |            | Q6PMR6     |            | A0A097H120 | 1.4% |
| Q8L5X3     |        |        |            | A0A097H118 |            | P58521     |            | O24384     |            | 1.6%       |      |
| Q8L5X6     |        |        |            | A0A097H118 |            | C5MRU4     |            | A0A097H155 |            |            |      |
| A0A097H180 |        |        |            | A0A097H118 |            | Q43646     |            | O24385     |            |            |      |
| A0A097H143 |        |        |            | A0A097H118 |            | O24385     |            | Q8RX93     |            |            | 1.1% |
| A0A097H139 |        |        |            | A0A097H118 |            | Q8RX93     |            | A0A097H166 |            |            |      |
| A0A097H148 |        |        |            | A0A097H118 |            | A0A097H166 |            | O24386     |            |            |      |
| A0A097H169 |        |        |            | A0A097H118 |            | O24386     |            | Q8RX92     |            |            |      |
| Q38M77     | 2.4%   |        |            | Q8RX92     | Q3S493     |            |            |            |            |            |      |
| A0A097H164 | 1.8%   |        | A0A097H158 | 1.0%       | M1AMY0     |            |            |            |            |            |      |
| M1AMY0     |        | M1AMY0 |            |            |            |            |            |            |            |            |      |

Table 6S. Identified and quantified proteins in other classes (non-patatin and non-inhibitor) by LC-MS/MS. Proteins were identified by their UniProt AC# and quantified sample-wise using the iBAQ algorithm in MaxQuant (normalized to riBAQ). <sup>1</sup>Probable heat shock-related protein. <sup>2</sup>Cold-stress inducible protein. <sup>3</sup>Probable metalloprotease inhibitor. <sup>4</sup>Histone. <sup>5</sup>Fruit-ripening protein. <sup>6</sup>Probable RNA-binding proteins. <sup>7</sup>Eukaryotic translation initiation factor 5A. <sup>8</sup>Probable Kunitz-type inhibitor (KTI-C type). <sup>9</sup>Probable Pathogenesis-related protein. <sup>10</sup>Probable Kunitz-type inhibitor (KTI-C type). <sup>11</sup>Linoleate 9S-lipoxygenase 1. <sup>12</sup>Probable linoleate 9S-lipoxygenase 3. <sup>13</sup>Probable Kunitz-type inhibitor (KTI-C type).

| AKV-Feed |       | AKV-K2 |                   | KMC-Feed          |                   | KMC-Food           |                    | AKV-PFJ            |                    |
|----------|-------|--------|-------------------|-------------------|-------------------|--------------------|--------------------|--------------------|--------------------|
| AC#      | riBAQ | AC#    | riBAQ             | AC#               | riBAQ             | AC#                | riBAQ              | AC#                | riBAQ              |
| M1DZV0   | 1.3%  | M1DJ69 | 4.3% <sup>1</sup> | M1AMY4            | 3.1% <sup>8</sup> | M1AMY4             | 1.8% <sup>10</sup> | Q43189             | 2.3% <sup>12</sup> |
|          |       | M0ZT86 |                   | M1AMY7            |                   | M1AMY7             |                    |                    |                    |
|          |       | M1DH04 |                   | M0ZMA9            | P37831            | 1.1% <sup>11</sup> | Q9SAP0             |                    |                    |
|          |       | M1AU55 |                   | M0ZMB0            |                   |                    | M1AMY4             | 1.5% <sup>13</sup> |                    |
|          |       | M1AU51 |                   | M0ZMA8            |                   |                    | M1AMY7             |                    |                    |
|          |       | M1AU54 |                   | A0A1L1Z6W0        |                   |                    |                    |                    |                    |
|          |       | M1AU53 |                   |                   |                   |                    |                    |                    |                    |
|          |       | M1AU49 |                   |                   |                   |                    |                    |                    |                    |
|          |       | M1AU50 |                   |                   |                   |                    |                    |                    |                    |
|          |       | O04232 |                   | 4.0% <sup>2</sup> |                   |                    |                    |                    |                    |
|          |       | M1AM40 |                   |                   |                   |                    |                    |                    |                    |
|          |       | Q6ST32 |                   |                   |                   |                    |                    |                    |                    |
|          |       | K7X8F1 |                   |                   |                   |                    |                    |                    |                    |
|          |       | M1A6J5 | 2.9% <sup>3</sup> |                   |                   |                    |                    |                    |                    |
|          |       | M1A6J6 |                   |                   |                   |                    |                    |                    |                    |
|          |       | M0ZJ50 |                   |                   |                   |                    |                    |                    |                    |
|          |       | O24639 |                   |                   |                   |                    |                    |                    |                    |
|          |       | M1BEW2 | 2.3% <sup>4</sup> |                   |                   |                    |                    |                    |                    |
|          |       | M1CM34 |                   |                   |                   |                    |                    |                    |                    |
|          |       | M1CM33 |                   |                   |                   |                    |                    |                    |                    |
|          |       | M1AG69 |                   |                   |                   |                    |                    |                    |                    |
|          |       | M1AG47 |                   |                   |                   |                    |                    |                    |                    |
|          |       | Q2XPW1 |                   |                   |                   |                    |                    |                    |                    |
|          |       | M1CUG9 |                   |                   |                   |                    |                    |                    |                    |
|          |       | M1C576 |                   |                   |                   |                    |                    |                    |                    |
|          |       | M1CT06 |                   |                   |                   |                    |                    |                    |                    |
|          |       | M1CUH0 |                   |                   |                   |                    |                    |                    |                    |
|          |       | Q2XTC9 | 2.0% <sup>5</sup> |                   |                   |                    |                    |                    |                    |
|          |       | M1A8I6 |                   |                   |                   |                    |                    |                    |                    |
|          |       | M1A8I5 |                   |                   |                   |                    |                    |                    |                    |
|          |       | M0ZJ84 | 1.1% <sup>6</sup> |                   |                   |                    |                    |                    |                    |
|          |       | Q2VCI6 |                   |                   |                   |                    |                    |                    |                    |
|          |       | Q38M49 |                   |                   |                   |                    |                    |                    |                    |
|          |       | M1D6C4 |                   |                   |                   |                    |                    |                    |                    |
|          |       | M1D7Q3 |                   |                   |                   |                    |                    |                    |                    |
|          |       | M1D7M9 |                   |                   |                   |                    |                    |                    |                    |
|          |       | Q38HT3 | 1.0% <sup>7</sup> |                   |                   |                    |                    |                    |                    |



|        |  |
|--------|--|
| P56337 |  |
| Q38M78 |  |
| P56335 |  |
| P56333 |  |
| K7VPG0 |  |

Table 7S: Experimental sequence coverage of the selected nine peptides from bioinformatic prediction and *in vitro* functional validation within quantified protein isoforms (patatins, KTI-A, and KTI-B) with 100% identity. Relative abundance (in % riBAQ within each sample) is given for all protein with 100% identity and >90% identity with the respective predicted peptide.

| Sample   | Experimental coverage | Protein | Patatin     |              |              |              | KTI-A       | KTI-B       |              |              |              |
|----------|-----------------------|---------|-------------|--------------|--------------|--------------|-------------|-------------|--------------|--------------|--------------|
|          |                       | Range   | $\gamma$ -1 | $\gamma$ -36 | $\alpha$ -10 | $\alpha$ -12 | $\beta$ -27 | $\beta$ -22 | $\gamma$ -38 | $\gamma$ -40 | $\gamma$ -49 |
| AKV-Feed | None                  | 0%      | 0.0%        | 3.8%         | 0.0%         | 0.0%         | 0.0%        | 0.0%        | 0.0%         | 0.0%         | 0.0%         |
|          | Low                   | < 25%   | 0.0%        | 0.0%         | 0.0%         | 0.0%         | 0.0%        | 0.0%        | 0.0%         | 0.0%         | 0.0%         |
|          | Partial               | 25-75%  | 0.0%        | 0.0%         | 25.3%        | 0.0%         | 0.0%        | 0.0%        | 5.1%         | 0.0%         | 0.0%         |
|          | High                  | >75%    | 20.2%       | 0.0%         | 0.9%         | 26.2%        | 0.0%        | 5.1%        | 0.0%         | 5.1%         | 0.0%         |
|          | Full                  | 100%    | 0.0%        | 46.5%        | 0.0%         | 0.0%         | 8.8%        | 0.0%        | 0.0%         | 0.0%         | 0.0%         |
| AKV-K2   | None                  | 0%      | 0.0%        | 24.5%        | 0.0%         | 0.0%         | 0.0%        | 5.5%        | 0.0%         | 5.5%         | 0.0%         |
|          | Low                   | < 25%   | 0.0%        | 0.0%         | 0.0%         | 0.0%         | 0.0%        | 0.0%        | 0.0%         | 0.0%         | 0.0%         |
|          | Partial               | 25-75%  | 0.0%        | 0.0%         | 14.5%        | 14.5%        | 0.0%        | 0.0%        | 5.5%         | 0.0%         | 0.0%         |
|          | High                  | >75%    | 9.5%        | 0.0%         | 0.0%         | 0.0%         | 0.0%        | 0.0%        | 0.0%         | 0.0%         | 0.0%         |
|          | Full                  | 100%    | 0.0%        | 0.0%         | 0.0%         | 0.0%         | 4.1%        | 0.0%        | 0.0%         | 0.0%         | 0.0%         |
| KMC-Feed | None                  | 0%      | 0.0%        | 3.8%         | 0.0%         | 0.0%         | 0.0%        | 0.0%        | 0.0%         | 0.0%         | 0.0%         |
|          | Low                   | < 25%   | 0.0%        | 0.0%         | 0.0%         | 0.0%         | 0.0%        | 0.0%        | 0.0%         | 0.0%         | 0.0%         |
|          | Partial               | 25-75%  | 0.0%        | 0.0%         | 37.1%        | 0.0%         | 0.0%        | 0.0%        | 3.4%         | 3.4%         | 0.0%         |
|          | High                  | >75%    | 1.1%        | 0.0%         | 0.0%         | 37.1%        | 0.0%        | 3.4%        | 0.0%         | 0.0%         | 0.0%         |
|          | Full                  | 100%    | 42.5%       | 49.9%        | 0.0%         | 0.0%         | 8.3%        | 0.0%        | 0.0%         | 0.0%         | 0.0%         |
| KMC-Food | None                  | 0%      | 0.0%        | 0.0%         | 0.0%         | 0.0%         | 0.0%        | 0.0%        | 0.0%         | 0.0%         | 0.0%         |
|          | Low                   | < 25%   | 0.0%        | 0.0%         | 0.0%         | 0.0%         | 0.2%        | 0.1%        | 0.0%         | 0.1%         | 0.0%         |
|          | Partial               | 25-75%  | 0.0%        | 0.0%         | 0.0%         | 0.0%         | 0.0%        | 0.0%        | 0.1%         | 0.0%         | 0.1%         |
|          | High                  | >75%    | 0.0%        | 0.0%         | 13.8%        | 0.0%         | 0.0%        | 0.1%        | 6.7%         | 0.1%         | 0.0%         |
|          | Full                  | 100%    | 11.1%       | 26.0%        | 0.0%         | 13.8%        | 12.3%       | 6.7%        | 0.0%         | 6.7%         | 0.0%         |
| AKV-PFJ  | None                  | 0%      | 0.0%        | 0.0%         | 0.0%         | 0.0%         | 0.0%        | 0.0%        | 0.0%         | 0.0%         | 0.0%         |
|          | Low                   | < 25%   | 0.0%        | 0.0%         | 0.0%         | 0.0%         | 0.0%        | 0.4%        | 0.0%         | 0.4%         | 0.0%         |
|          | Partial               | 25-75%  | 0.0%        | 0.0%         | 16.3%        | 16.3%        | 0.0%        | 0.0%        | 0.0%         | 0.0%         | 0.0%         |
|          | High                  | >75%    | 0.7%        | 0.9%         | 0.0%         | 0.0%         | 0.0%        | 0.0%        | 6.2%         | 0.0%         | 0.2%         |
|          | Full                  | 100%    | 16.3%       | 19.6%        | 0.0%         | 0.0%         | 8.9%        | 5.8%        | 0.0%         | 5.8%         | 0.0%         |

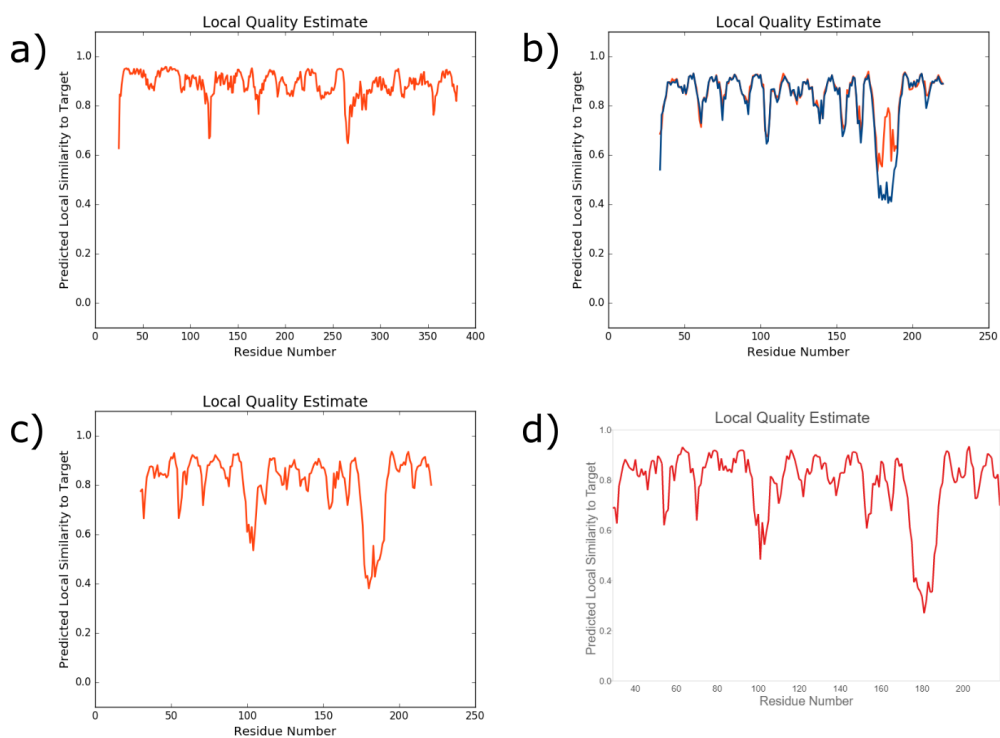

Fig. 1S: Local quality estimates of the template protein models from SwissModel. A) Patatin-B2 (P15477), b) KTI-A (Q3S488), c) KTI-B (Q3S474), and d) KTI-B (Q3S477). QMEAN > 0.75 indicates a good fit between model and template. For KTI-A, QMEAN is shown for both chains in a homo-dimer, where the best fit (chain A, orange) was used for localization of  $\beta$ -27.

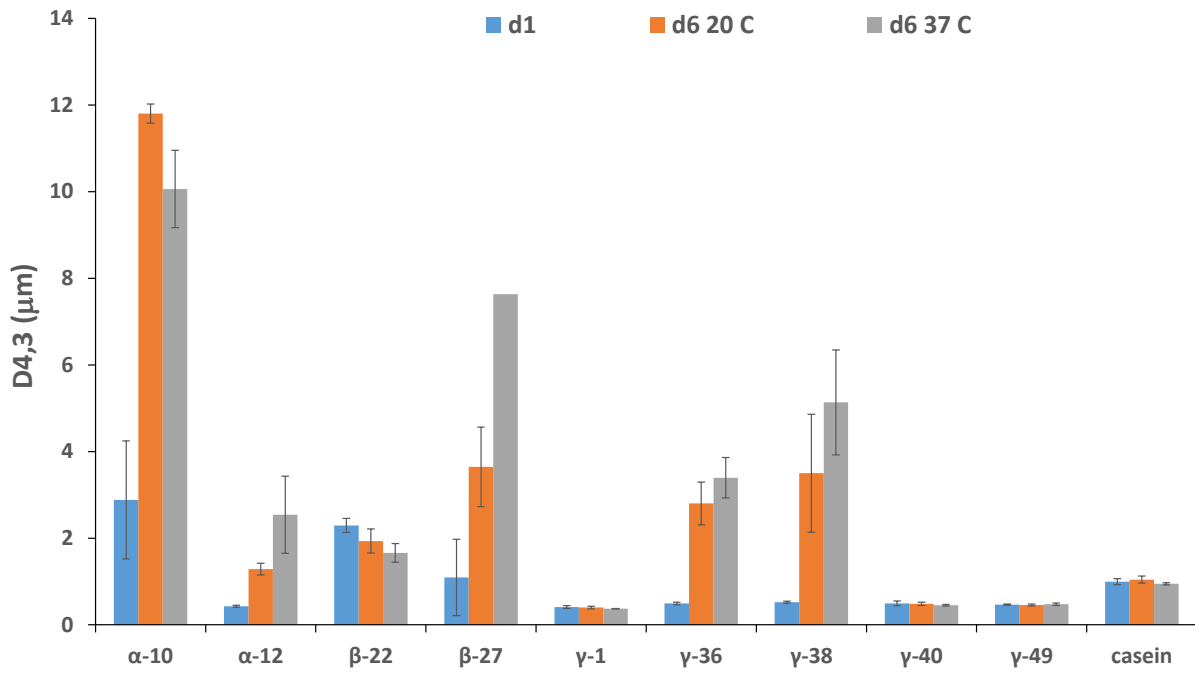

Fig. 2S. Droplet size distribution of emulsions stabilized with selected emulsifier peptides at day 1 and after 6 days storage at 20 °C or 37 °C.
